# Supplementary material for: Drug Nanorod-Mediated Intracellular Delivery of microRNA-101 for Self-sensitization via Autophagy Inhibition
Source: PubMed Central journal article supplement (PMC7770860; doi:10.1007/s40820-019-0310-0), 2019-09-25
Supplement: 40820_2019_310_MOESM1_ESM.pdf [file 40820_2019_310_MOESM1_ESM.pdf]

Supporting Information for

## Drug Nanorod-Mediated Intracellular Delivery of microRNA-101 for Self-sensitization *via* Autophagy Inhibition

Xiaofei Xin<sup>1</sup>, Xiaoqing Du<sup>1</sup>, Qingqing Xiao<sup>1</sup>, Helena S. Azevedo<sup>2</sup>, Wei He<sup>1,\*</sup>, Lifang Yin<sup>1,\*</sup>

<sup>1</sup>Department of Pharmaceutics, School of Pharmacy, China Pharmaceutical University, Nanjing, 210009, People's Republic of China

<sup>2</sup>School of Engineering and Materials Science, Institute of Bioengineering, Queen Mary, University of London, London, E1 4NS, UK

\*Corresponding authors. E-mail: [1019940752@cpu.edu.cn](mailto:1019940752@cpu.edu.cn) (Lifang Yin); [weihe@cpu.edu.cn](mailto:weihe@cpu.edu.cn) (Wei He)

### Supplementary Figures

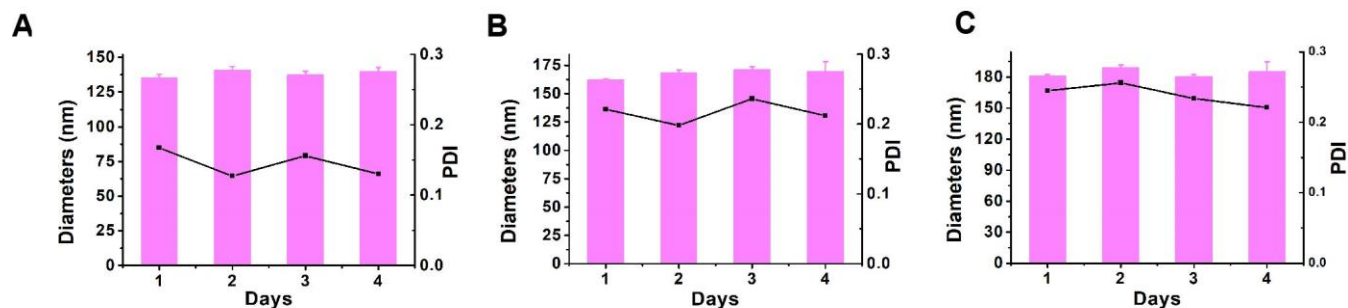

**Fig. S1** The stability of (A) PNs, (B) PNplex and (C) HA-PNplex incubated in 10% serum at 37 °C for 4 days

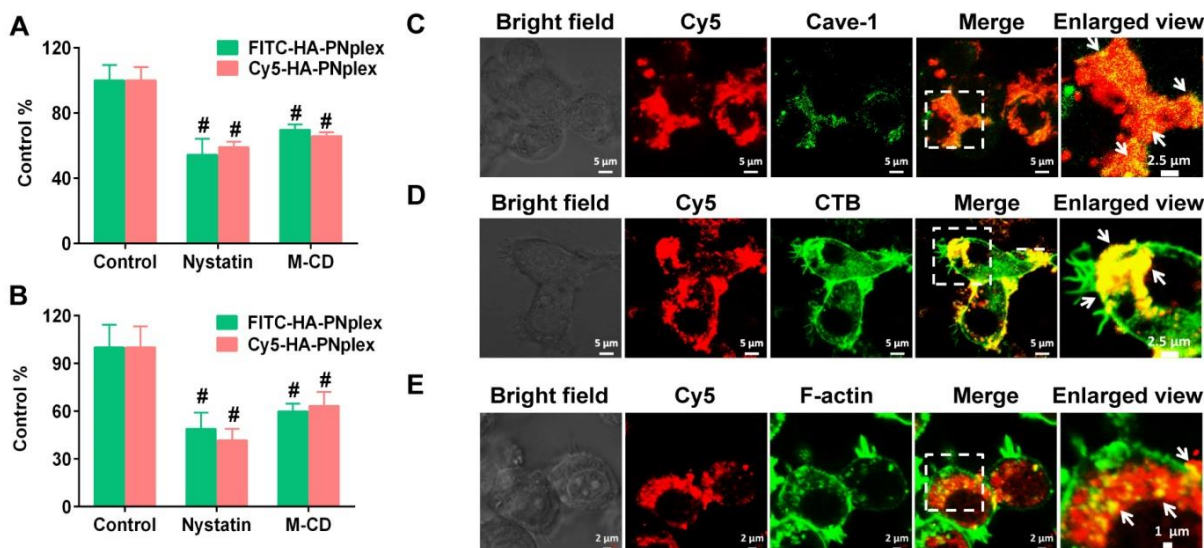

**Fig. S2** Endocytic pathway and caveolae trafficking. Cellular uptake of FITC or Cy5-labeled HA-PNplex in (A) MCF-7 and (B) Caco-2 cells pretreated with nystatin or M-CD for 0.5 h at 37 °C at a FITC concentration of 2.5  $\mu\text{g mL}^{-1}$  or Cy5-miR-101 at 100 nM. The fluorescence intensity was detected using FCM. <sup>#</sup> $P < 0.001$  versus the control ( $n = 5$ ). (C–E) Caveolae-trafficking study. Co-localization of Cy5-HA-PNplex with Alexa Fluor 488-labeled (C) Cave-1 and (D) CTB and FITC-labeled (E) F-actin in Caco-2 cells was observed using CLSM post incubation at a Cy5 concentration of 100 nM for 3 h at 37 °C. Yellow fluorescence indicates the co-localization.

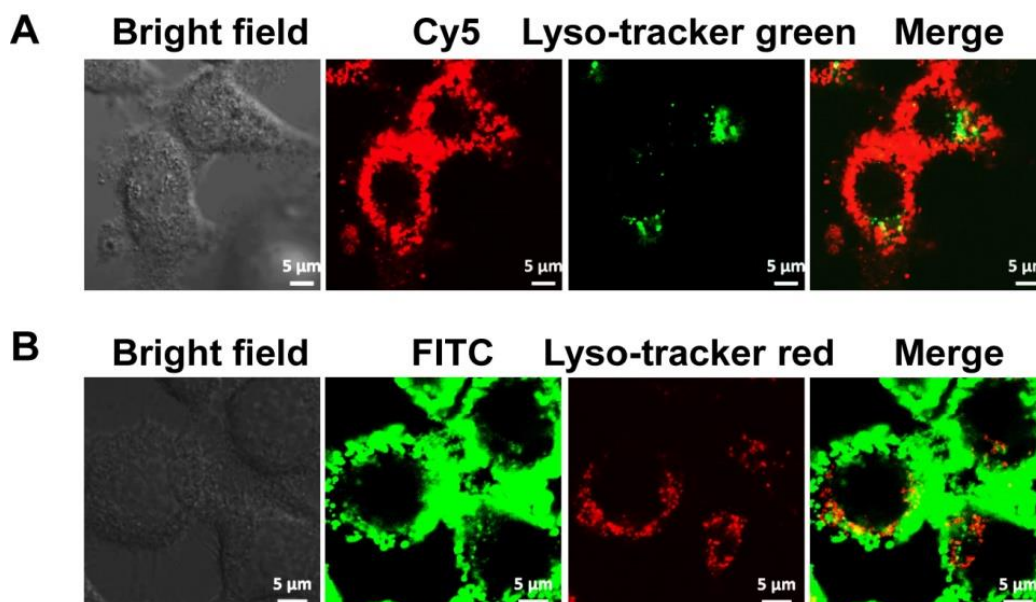

**Fig. S3** Co-localization of (A) Cy5- or (B) FITC-labeled HA-PNplex with lysosomes in MCF-7 cells upon incubation with a FITC concentration of 2.5  $\mu\text{g mL}^{-1}$  or Cy5-miR-101 concentration of 100 nM at 37 °C for 3 h

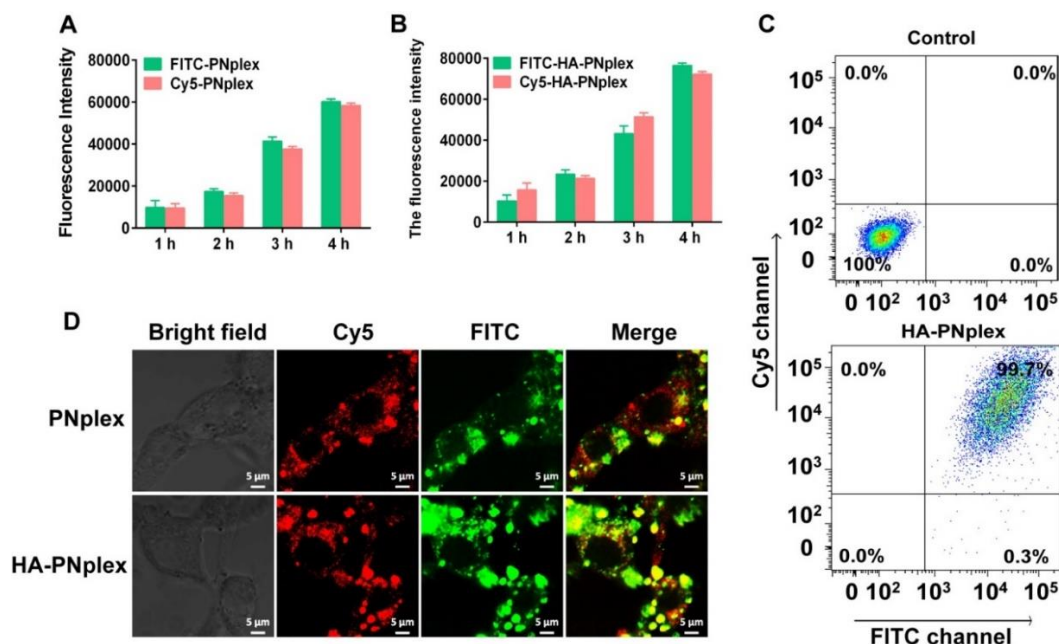

**Fig. S4** Time-related cellular uptake of dual-labeled (A) PNplex and (B) HA-PNplex in MCF-7 cells after incubation at 37 °C with a FITC concentration of 2.5  $\mu\text{g mL}^{-1}$  or Cy5-miR-101 concentration of 100 nM. The higher fluorescence intensity of HA-PNplex over PNplex indicated the targeting-ability of HA toward CD44-receptors. (C) Flow-cytometry images of the intracellular uptake of HA-PNplex. (D) Intracellular distribution of dual-labeled PNplex and HA-PNplex in MCF-7 cells after incubation at 37 °C for 3 h. Yellow spots indicate the integrity of the nanoparticles.

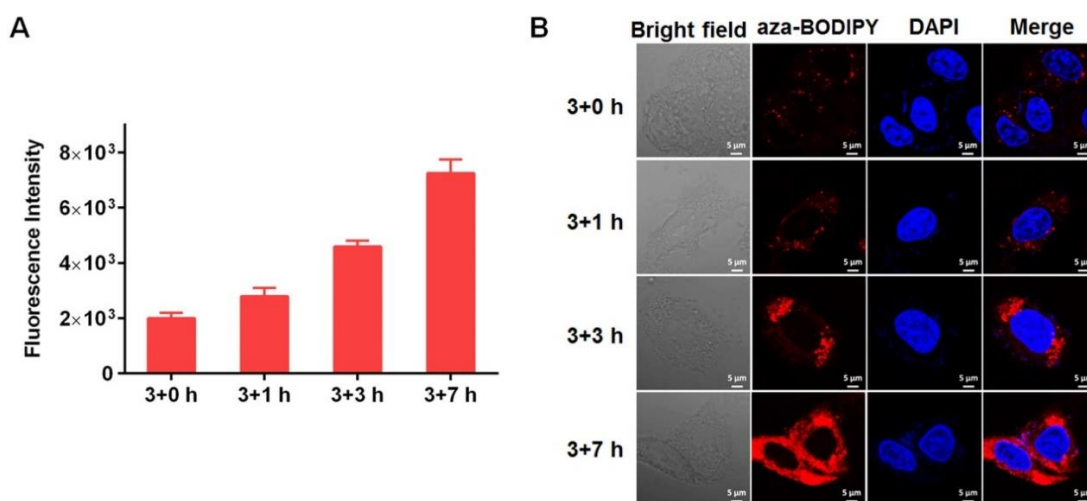

**Fig. S5** Intracellular fate study. MCF-7 cells were cultured with aza-BODIPY labeled HA-PNplex at 37 °C for 3 h first using an aza-BODIPY concentration of 500  $\text{ng mL}^{-1}$ , followed by serum-free media incubation for 0, 1, 3, 7 h at 37 °C. (A) Fluorescence intensity quantified by flow cytometry and (B) CLSM observation. When released in the cytoplasm the aza-BODIPY dye emits red fluorescence

owing to the aggregation in intracellular lipid-substrates. The red fluorescence indicates the release of the dye from the aza-BODIPY labeled HA-PNplex and, therefore, implies the disintegration of the nanoparticles.

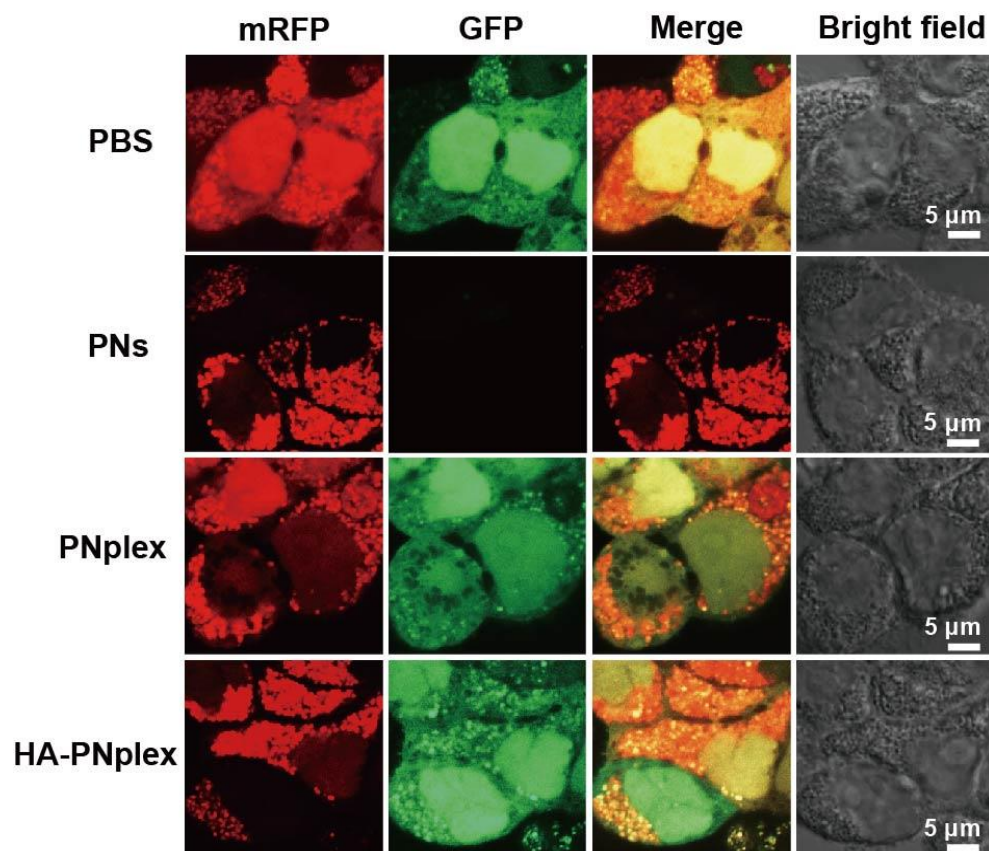

**Fig. S6** Study of autophagy flux in mRFP/EGFP-MCF-7 cells incubated with  $10 \mu\text{g mL}^{-1}$  PTX or  $100 \text{ nM}$  miR-101 for 24 h at  $37 \text{ }^\circ\text{C}$ . The green fluorescence is negatively correlated with the fusion of autophagosomes and lysosomes. The yellow fluorescence indicates the absent fusion of autophagosomes and lysosomes.



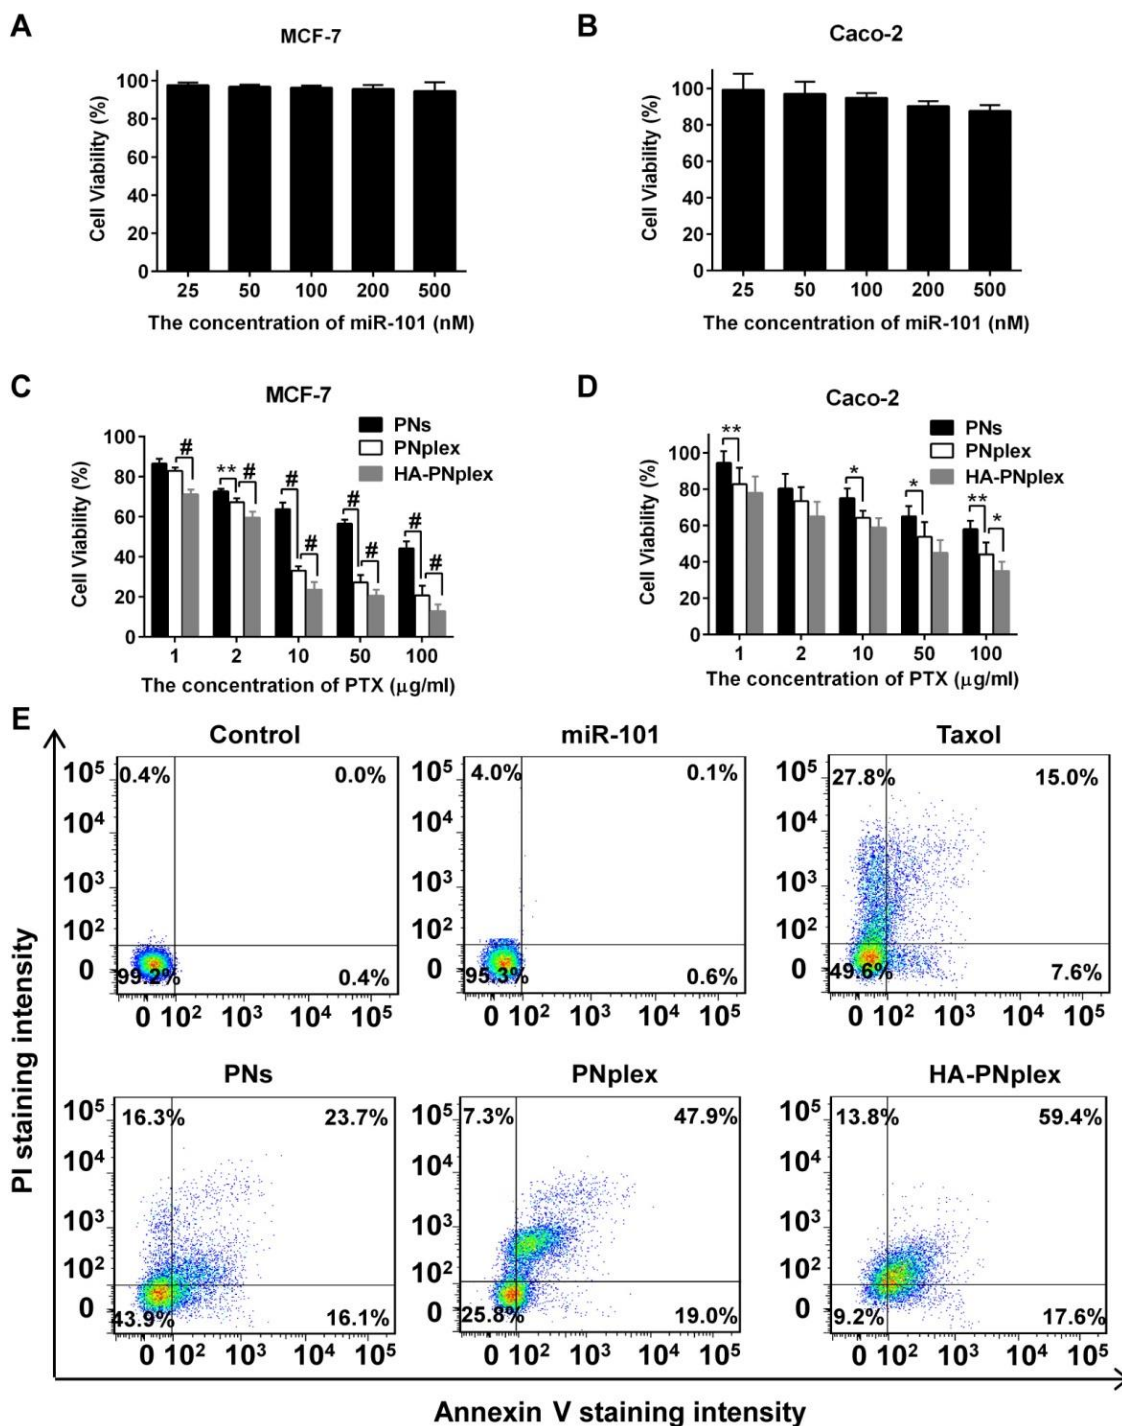

**Fig. S7** Cell viability and apoptosis. Cytotoxicity of naked miR-101 in (A) MCF-7 cells for 48 h and (B) Caco-2 cells for 4 h at serial miR-101 concentrations at 37 °C. Cytotoxicity of the nanoparticles with various PTX concentrations after incubation at 37 °C for 48 h for (C) MCF-7 cells or 4 h for (D) Caco-2 cells ( $n = 5$ ,  $*P < 0.05$ ,  $**P < 0.01$  and  $\#P < 0.001$ ). (E) Flow-cytometry images of cell apoptosis

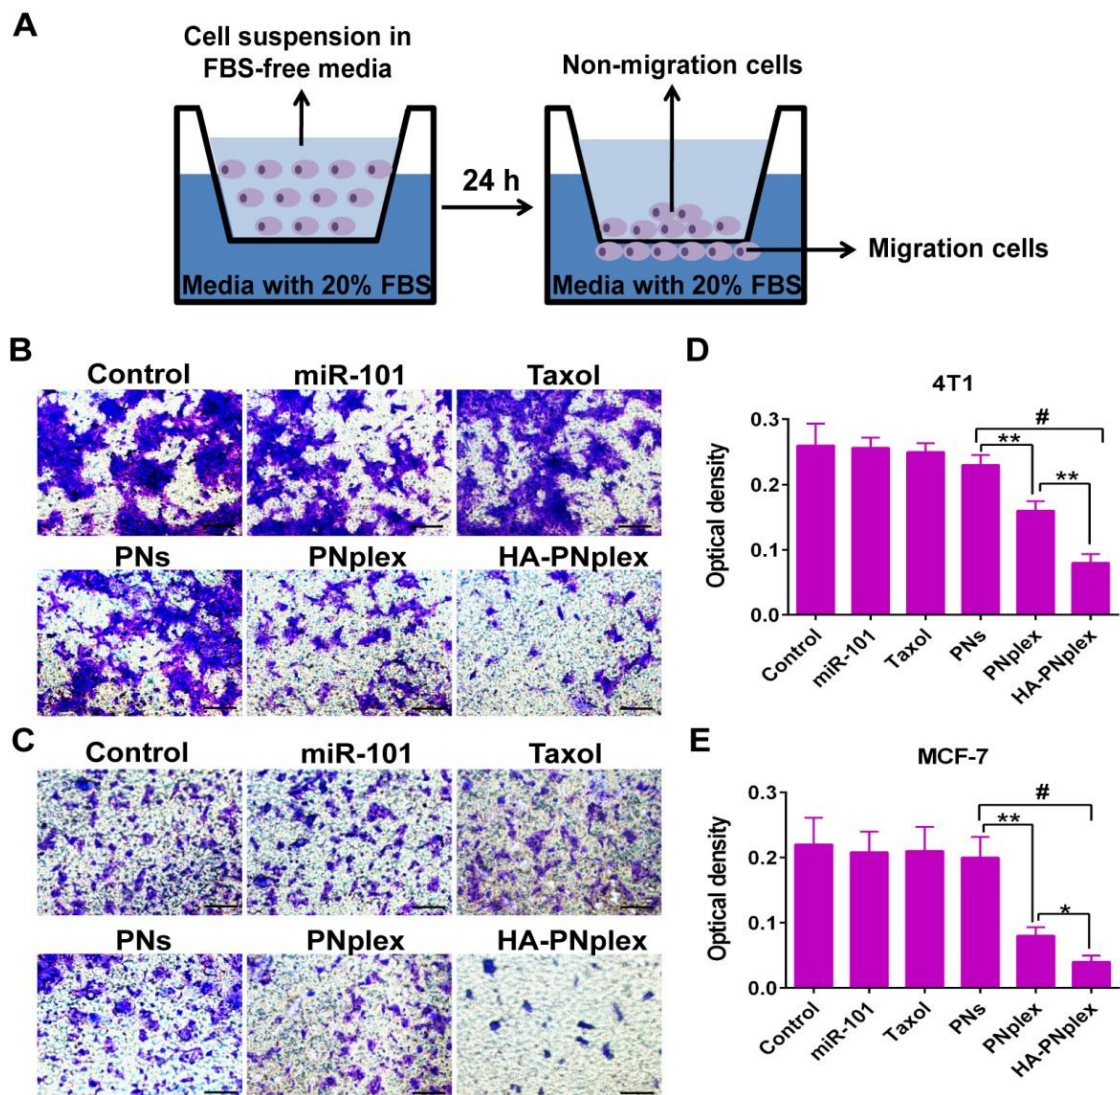

**Fig. S8** *In vitro* anti-metastasis study. (A) Scheme of cell migration in the transwell chamber. Migration suppression of (B) 4T1 and (C) MCF-7 cell lines studied by a transwell chamber assay at 37 °C. Violet spots represent migrated cells. The control group corresponds to cells without treatment. The scale bar is 50  $\mu\text{m}$ . Quantitative analysis of cell migration in (D) 4T1 and (E) MCF-7 cells ( $n = 3$ , \* $P < 0.05$ , \*\* $P < 0.01$  and # $P < 0.001$  vs control)

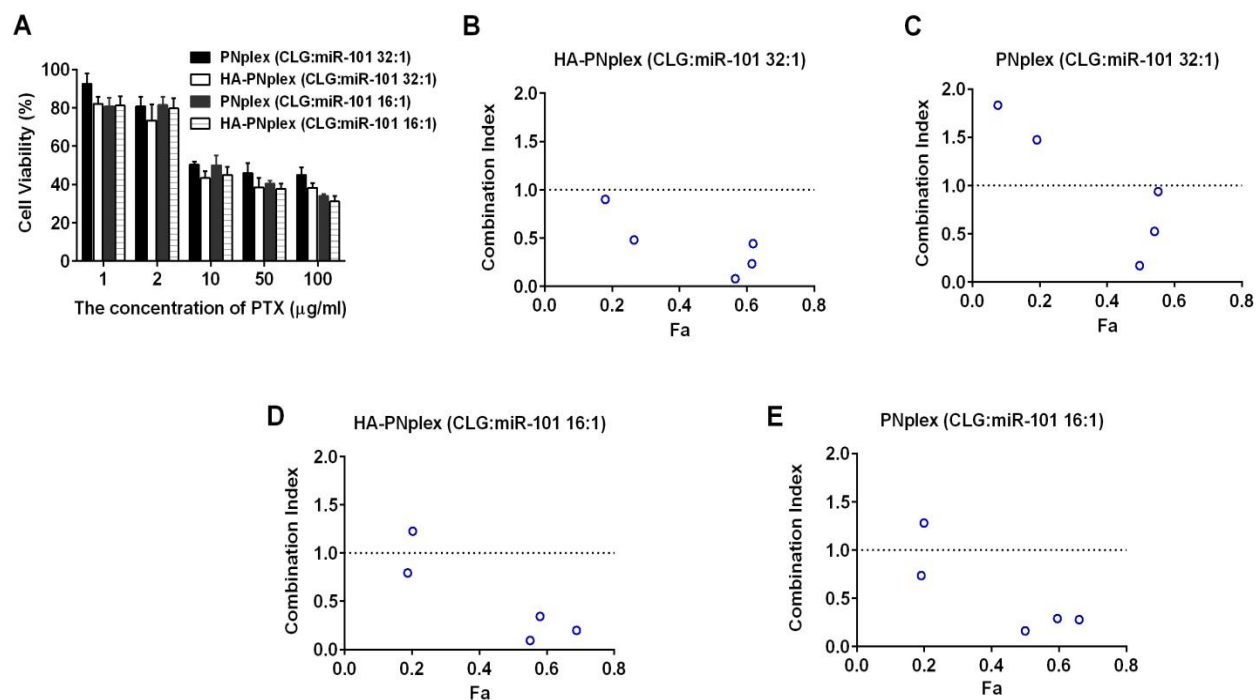

**Fig. S9** Synergy of combinatorial therapy. (A) Cell viability upon exposure to PNplex and HA-PNplex at different CLG/miR-101 ratios with PTX concentration ranging from 1 to 100  $\mu\text{g mL}^{-1}$ ; Based on the cytotoxicity results, the coefficient of drug interaction (CDI) between the two drugs was calculated by the CompuSyn software. (B–E) Combination Index (CI) plot of above different formulations.  $Fa$  represents the fractional inhibition value.  $CI < 1$ ,  $= 1$ , and  $> 1$  indicates synergism, additive effect and antagonism, respectively.

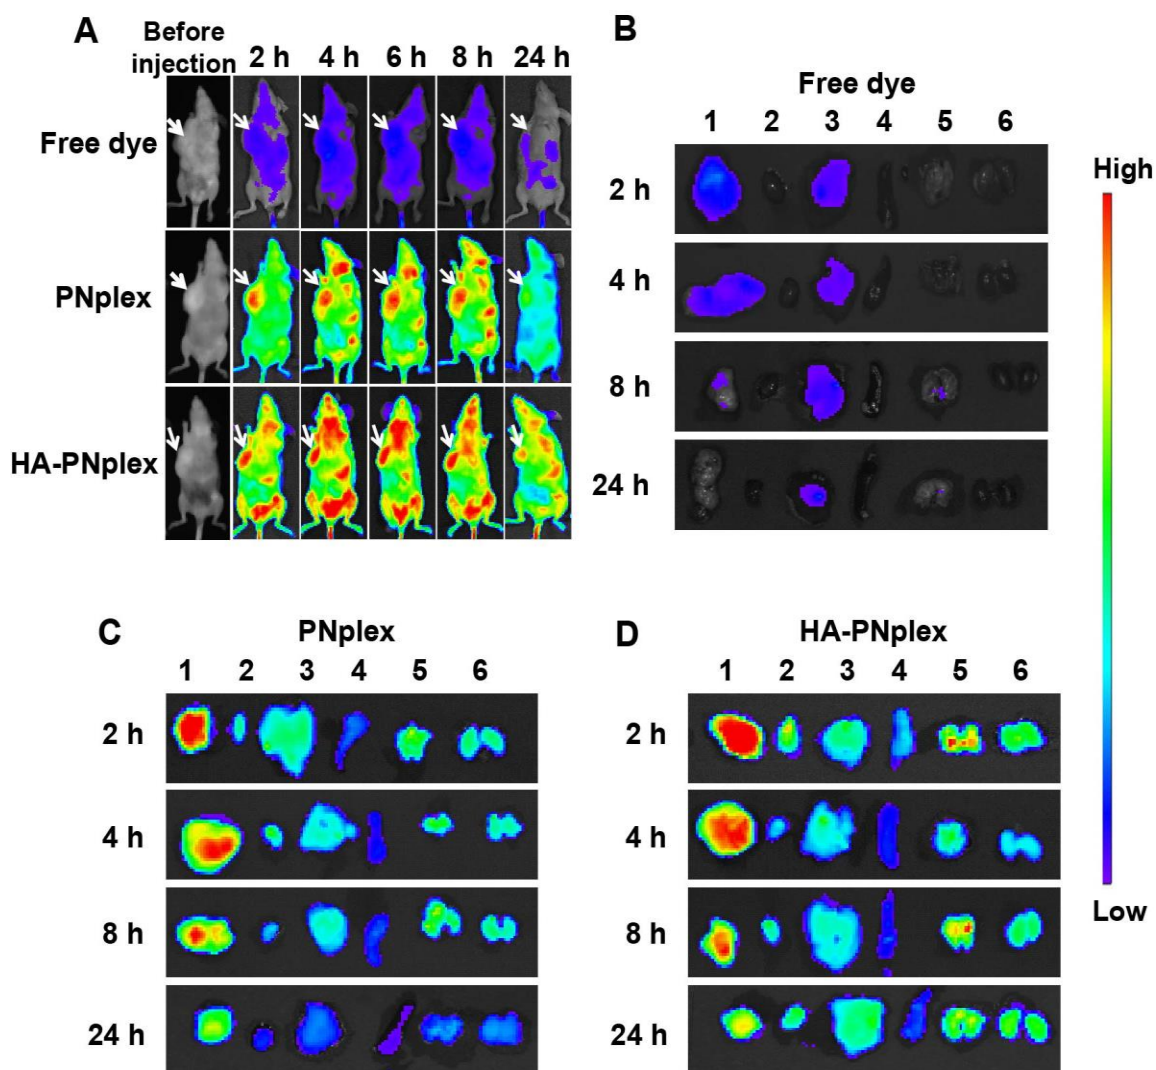

**Fig. S10** Biodistribution and tumor targeting studies. (A) *In vivo* imaging of MCF-7 tumor-bearing nude Balb/C mice (pointed by the white arrow) at predetermined time points after injection of IR 783-labeled nanoparticles (red fluorescence) at an IR783 dose of 2.5 mg/kg based on the body's weight. Free IR783 was used as control. (B–D) *Ex vivo* fluorescence images of tissues including tumor (1), heart (2), liver (3), spleen (4), lung (5) and kidneys (6) collected at 2 h, 4 h, 8 h, and 24 h following injection



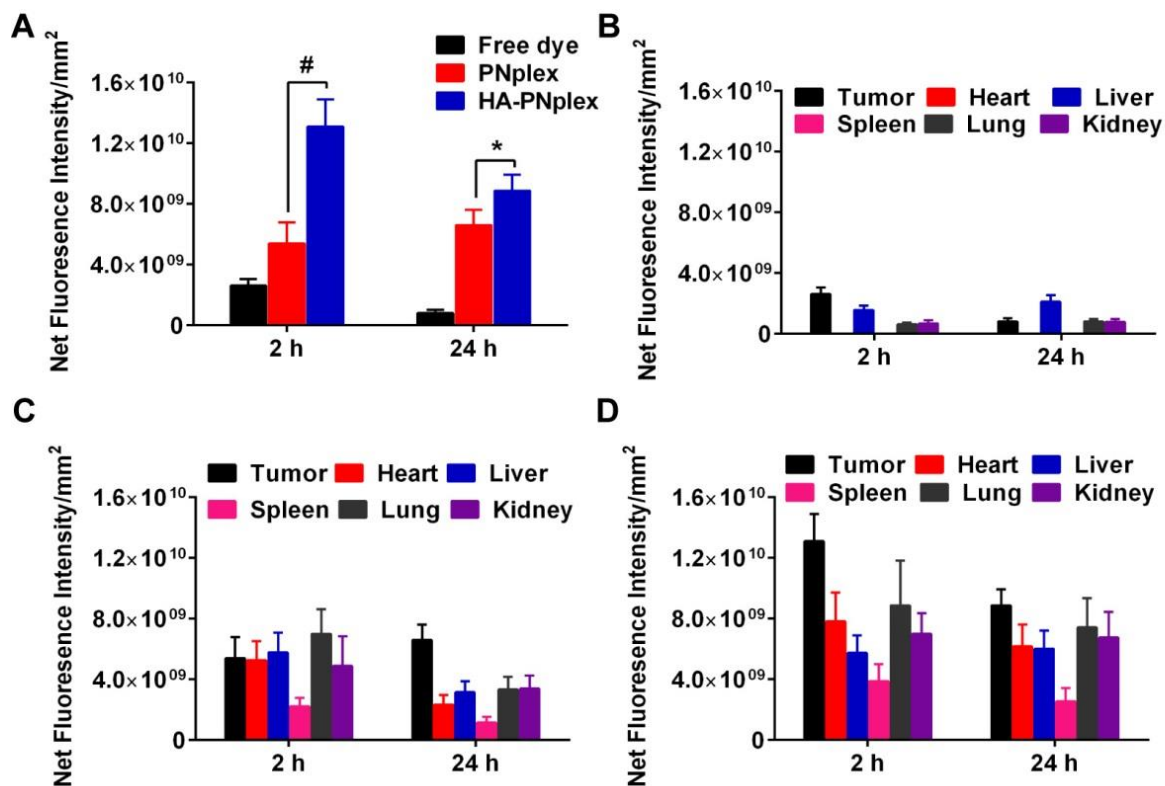

**Fig. S11** (A) Quantification assay of accumulation of IR783-labeled nanoparticles in tumor at predetermined time points following injection at a IR783 dose of 2.5 mg kg<sup>-1</sup>, according to the animal's weight ( $n = 3$ ,  $*P < 0.05$  and  $\#P < 0.001$ ). Quantified accumulation of (B) free IR783, (C) IR783-PNplex and (D) IR783-HA-PNplex in tissues at 2 and 24 h post injection

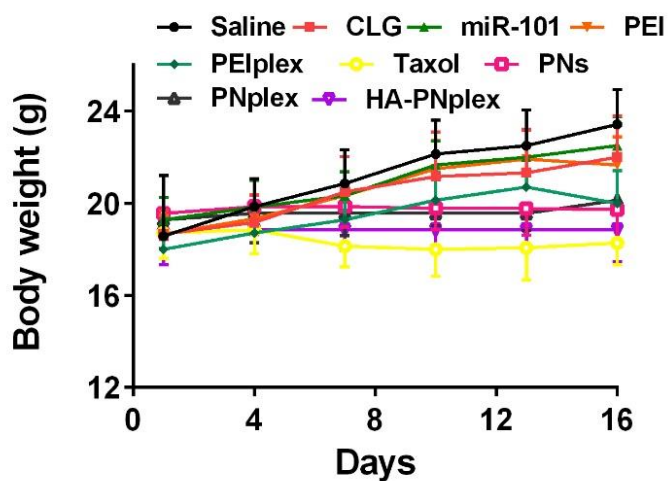

**Fig. S12** Body weights in antitumor efficacy ( $n = 6$ )

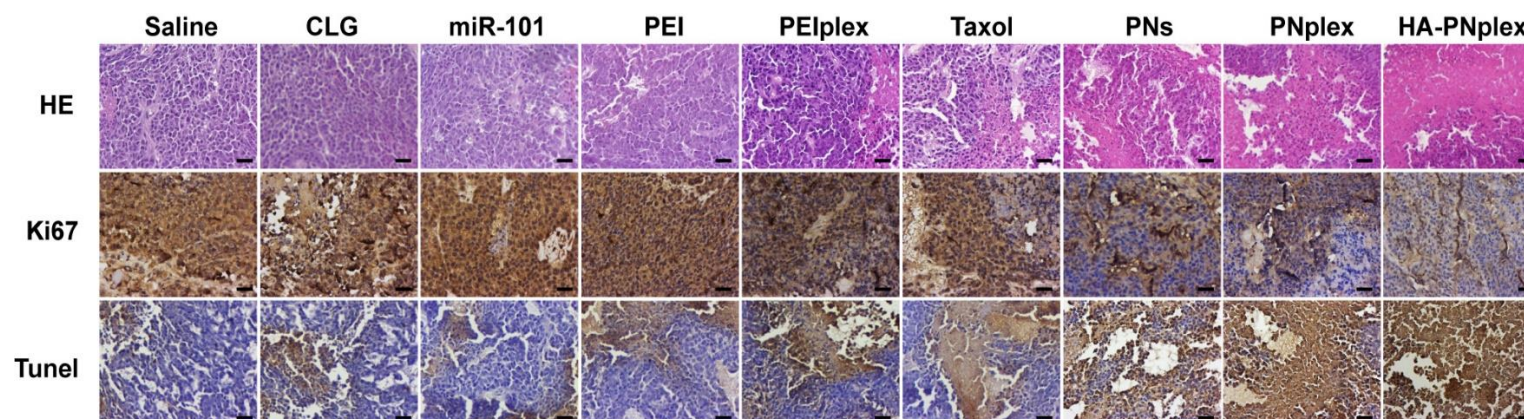

**Fig. S13** H&E staining, Ki67 and TUNEL analysis of the tumor specimens. The brown-stained cells represent positive cells in the Ki67 and TUNEL assay. Nuclei are stained blue, while extracellular matrix and cytoplasm are stained red in H&E analysis. The absence of nuclei represents the necrosis of tumor cells. The scale bar is 20  $\mu\text{m}$ .

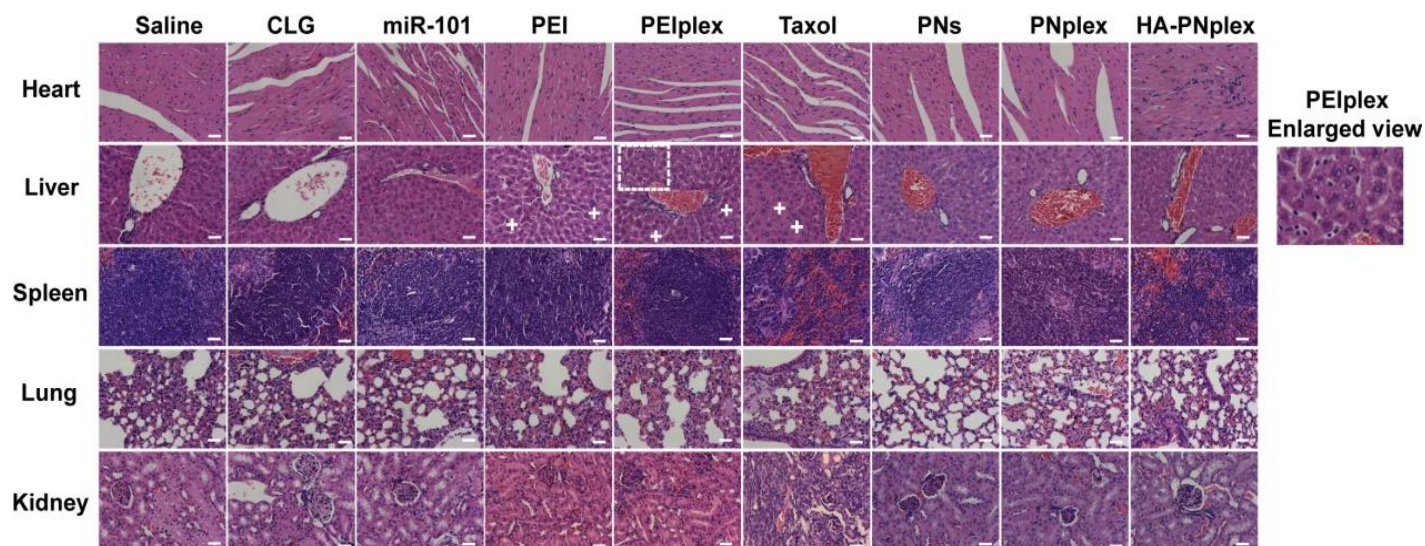

**Fig. S14** Representative histological images from retrieved tissues. Formulations were administered to MCF-7 tumor-bearing nude Balb/C mice *via* tail vein injections every 3 days at a PTX dose of 10  $\text{mg kg}^{-1}$  or a miR-101 dose of 1  $\text{mg kg}^{-1}$ , according to the animal's body



weight. The tissues were collected at day 17 post repeat dosing. Nuclei are stained blue while extracellular matrix and cytoplasm are stained red in H&E analysis. “+” represents the positive area. The scale bar is 20  $\mu\text{m}$ . The enlarged view of PEIplex-treated group is the positive area displayed as spotty or lytic necrosis and hydropic degeneration induced by inflammation.

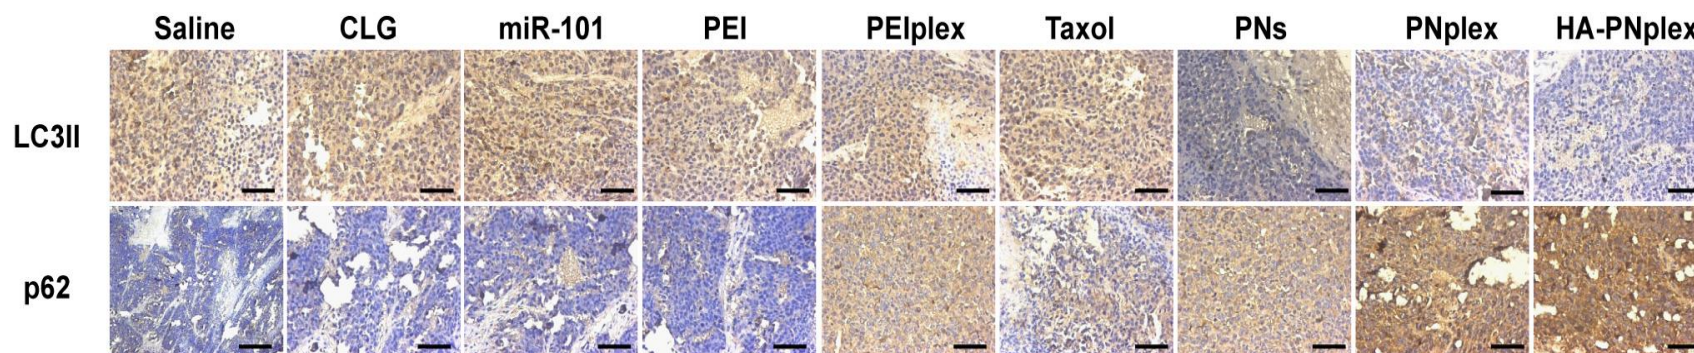

**Fig. S15** *In vivo* inhibition of autophagy flux. Immunohistochemistry images of LC3II and p62 in tumor specimens. The brown-stained cells represent the positive cells in the LC3II and p62 IHC assay and nuclei are stained blue. The scale bar is 20  $\mu\text{m}$ .
